# Supplementary material for: Discovery of new non-pyrimidine scaffolds as Plasmodium falciparum DHFR inhibitors by fragment-based screening
Source: PubMed Central journal article supplement — J Enzyme Inhib Med Chem. 2021 Feb 2;36(1):198–206. doi: 10.1080/14756366.2020.1854244 (PMC8759724; doi:10.1080/14756366.2020.1854244), 2021-02-02
Supplement: IENZ_A_1854244_SM1433.pdf [file IENZ_A_1854244_SM1433.pdf]

## Supplementary Materials

**Table S1.** Data collection and refinement statistics of the ternary complexes of WT-PfDHFR-TS.

|                                                                      | <b>148</b>                                                 | <b>263</b>                                                 | <b>820</b>                                                 |
|----------------------------------------------------------------------|------------------------------------------------------------|------------------------------------------------------------|------------------------------------------------------------|
| PDB ID code                                                          | 7CTZ                                                       | 7CTY                                                       | 7CTW                                                       |
| <i>Data collection</i>                                               |                                                            |                                                            |                                                            |
| Wavelength (Å)                                                       | 1.5418                                                     | 1.5418                                                     | 1.5418                                                     |
| Space group                                                          | <i>P</i> 2 <sub>1</sub> 2 <sub>1</sub> 2 <sub>1</sub>      | <i>P</i> 2 <sub>1</sub> 2 <sub>1</sub> 2 <sub>1</sub>      | <i>P</i> 2 <sub>1</sub> 2 <sub>1</sub> 2 <sub>1</sub>      |
| Unit-Cell Parameters                                                 |                                                            |                                                            |                                                            |
| <i>a</i> , <i>b</i> , <i>c</i> (Å)                                   | <i>a</i> =56.638<br><i>b</i> =155.639<br><i>c</i> =164.614 | <i>a</i> =56.143<br><i>b</i> =154.088<br><i>c</i> =163.598 | <i>a</i> =56.185<br><i>b</i> =154.730<br><i>c</i> =163.816 |
| Resolution <sup>a</sup> (Å)                                          | Inf–2.65 (2.75–2.65)                                       | Inf–2.80 (2.90–2.80)                                       | Inf–2.65 (2.75–2.65)                                       |
| Total reflections                                                    |                                                            |                                                            |                                                            |
| Unique reflections                                                   |                                                            |                                                            |                                                            |
| Completeness (%)                                                     | 97.8 (100.0)                                               | 96.4 (87.5)                                                | 97.8 (90.7)                                                |
| < <i>I</i> / $\sigma$ ( <i>I</i> )>                                  | 8.53 (2.10)                                                | 12.68 (3.17)                                               | 10.15 (2.03)                                               |
| <i>R</i> <sub>merge</sub> <sup>b</sup> (%)                           | 15.76 (47.15)                                              | 9.27 (18.76)                                               | 13.95 (39.11)                                              |
| <i>Refinement</i>                                                    |                                                            |                                                            |                                                            |
| <i>R</i> <sub>work</sub> / <i>R</i> <sub>free</sub> (%) <sup>c</sup> | 20.1/27.6                                                  | 22.0/30.4                                                  | 22.1/30.1                                                  |
| No. of Atoms/Average                                                 |                                                            |                                                            |                                                            |
| B-factors (Å <sup>2</sup> )                                          |                                                            |                                                            |                                                            |
| Protein                                                              | 17164/34.5                                                 | 16744/29.5                                                 | 17036/30.5                                                 |
| Inhibitor                                                            | 38/34.4                                                    | 58/35.3                                                    | 30/46.9                                                    |
| NDP                                                                  | 138/44.4                                                   | 67/19.4                                                    | 138/52.4                                                   |
| UMP                                                                  | 60/29.4                                                    | -                                                          | -                                                          |
| PO <sub>4</sub>                                                      | -                                                          | 10/43.6                                                    | 5/42.8                                                     |
| Water                                                                | 58/15.1                                                    | 16/6.5                                                     | 65/10.5                                                    |
| R.m.s. deviation                                                     |                                                            |                                                            |                                                            |
| Bond lengths (Å)                                                     | 0.0102                                                     | 0.0076                                                     | 0.0078                                                     |
| Bond angles (°)                                                      | 1.844                                                      | 1.648                                                      | 1.683                                                      |
| Ramachadran Plot                                                     |                                                            |                                                            |                                                            |
| favored (%)                                                          | 92.48                                                      | 89.66                                                      | 91.64                                                      |
| allowed (%)                                                          | 5.90                                                       | 6.93                                                       | 6.63                                                       |
| outlier (%)                                                          | 1.62                                                       | 3.41                                                       | 1.73                                                       |

<sup>a</sup> Values in parentheses are for the highest-resolution shell.

<sup>b</sup>  $R_{merge} = \sum_{hkl} \sum_i |I_i(hkl) - \langle I(hkl) \rangle| / \sum_{hkl} \sum_i I_i(hkl)$ , where  $I_i(hkl)$  is the intensity of an individual reflection and  $\langle I(hkl) \rangle$  is the mean intensity of symmetry-equivalent reflections.

<sup>c</sup>  $R_{work} = \sum_{hkl} ||F_{obs}| - |F_{calc}|| / \sum_{hkl} |F_{obs}|$ , where  $F_{obs}$  and  $F_{calc}$  are the observed and calculated structure-factor amplitudes, respectively.  $R_{free}$  was calculated in the same manner as  $R_{work}$  but using only a 5% unrefined subset of the reflection data.

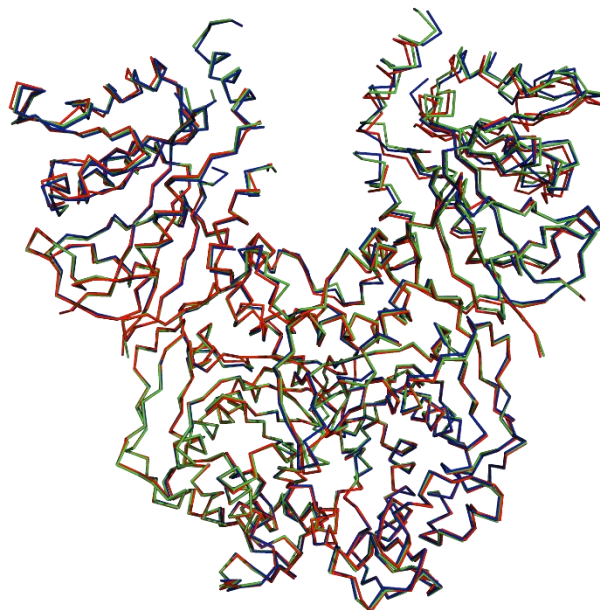

**Figure S1.** Superimposition of crystal structure backbones for complexes with fragments **263** (red), **820** (blue) and **148** (green).

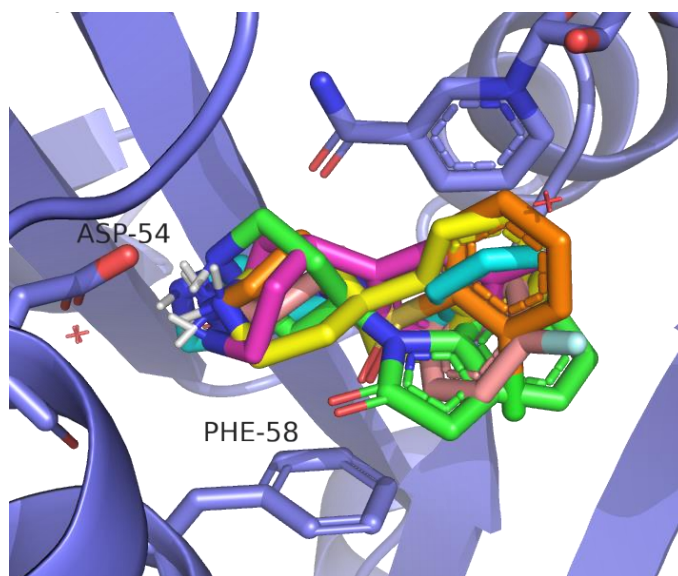

**Figure S2.** Superimposition of docking poses obtained for fragments **132** (green), **80** (cyan), **800** (orange), **240** (magenta), **1157** (pink) and **813** (yellow).

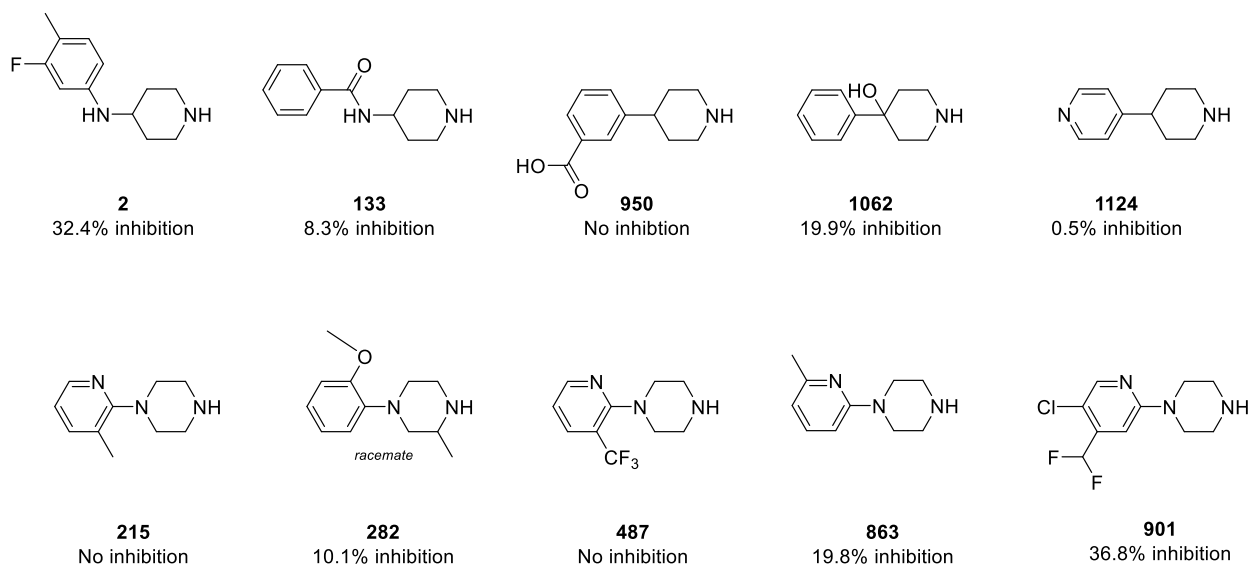

**Figure S3.** Examples of other piperidine and piperazine-based fragments from the BIONET Premium library and their inhibition of WT *Pf*DHFR at 500  $\mu$ M.

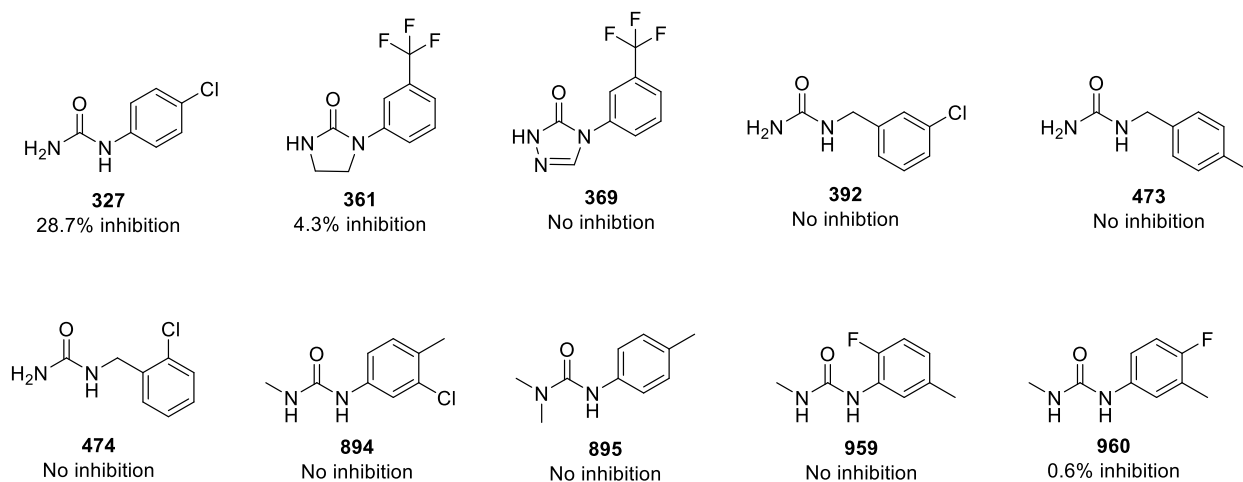

**Figure S4.** Structure of non-hit fragments analog to **148** from the BIONET Premium library and their inhibition of WT *Pf*DHFR at 500  $\mu$ M.
